# Supplementary material for: Role of Lung Ultrasound in Predicting Clinical Severity and Fatality in COVID-19 Pneumonia
Source: J Pers Med. 2021 Jul 30;11(8):757. doi: 10.3390/jpm11080757 (PMC8399683; doi:10.3390/jpm11080757)
Supplement: Supplementary file 1 [file jpm-11-00757-s001.zip]

Archive with 6 entries (6 files):
- Supplementary file 1 - STROBE checklist cohort (1).pdf
- Supplementary file 2 - Mean infiltration scores by regions of the lungs (1).pdf
- Supplementary file 3 - Logistic regression according to highest respiratory support (mechanical ventilation) (1).pdf
- Supplementary file 4 - ROC LUS over LAB.pdf
- Supplementary file 5 - Logistic regression according to mortality (1).pdf
- Supplementary file 6 - Multivariate and ROC analysis when all ultrasonic parameters included.pdf
