# Supplementary material for: Role of Lung Ultrasound in Predicting Clinical Severity and Fatality in COVID-19 Pneumonia
Source: J Pers Med. 2021 Jul 30;11(8):757. doi: 10.3390/jpm11080757 (PMC8399683; doi:10.3390/jpm11080757)
Supplement: Supplementary file 1 [file jpm-11-00757-s001.zip › Supplementary file 2 - Mean infiltration scores by regions of the lungs (1).pdf]

Table S1 – Mean infiltration scores by regions of the lungs

|           | Mean (SD)   | Minimum<br>maximum | Median<br>(IQR) |
|-----------|-------------|--------------------|-----------------|
| Region 1  | 2.26 (1.04) | 0 – 3              | 3 (2 – 3)       |
| Region 2  | 2.06 (1.00) | 0 – 3              | 2 (2 – 3)       |
| Region 3  | 1.36 (1.02) | 0 – 3              | 1 (0.5 – 2)     |
| Region 4  | 2.08 (1.10) | 0 – 3              | 2 (2 – 3)       |
| Region 5  | 1.89 (1.08) | 0 – 3              | 2 (1 – 3)       |
| Region 6  | 1.12 (1.07) | 0 – 3              | 1 (0 – 2)       |
| Region 7  | 1.94 (1.03) | 0 – 3              | 2 (1 – 3)       |
| Region 8  | 1.92 (1.02) | 0 – 3              | 2 (1 – 3)       |
| Region 9  | 2.00 (0.97) | 0 – 3              | 2 (1 – 3)       |
| Region 10 | 1.98 (1.00) | 0 – 3              | 2 (1 – 3)       |
| Region 11 | 1.35 (1.16) | 0 – 3              | 2 (0 – 2)       |
| Region 12 | 1.79 (1.14) | 0 – 3              | 2 (1 – 3)       |
| Region 13 | 1.52 (1.17) | 0 – 3              | 2 (0 – 3)       |
| Region 14 | 1.66 (1.27) | 0 – 3              | 2 (0 – 3)       |
| Basal     | 1.85 (0.70) | 0 – 3              | 2 (1.5 – 2.3)   |
| Middle    | 1.96 (0.79) | 0 – 3              | 2 (1.5 – 2.5)   |
| Upper     | 1.48 (0.80) | 0 – 3              | 1.5 (1 – 2.2)*  |
| Right     | 1.81 (0.68) | 0 – 3              | 1.9 (1.4 – 2.3) |
| Left      | 1.75 (0.72) | 0 – 3              | 1.9 (1.4 – 2.3) |

\*Friedmann test:  $F = 26.84$ ,  $DF1 = 2$ ,  $DF2 = 260$ ,  $P < 0.001$ ; multiple comparisons detected difference ( $P < 0.05$ ) between upper regions and all other.

Acronyms: IQR – interquartile range; SD – standard deviation.

Table S2 – Ultrasonic according to highest respiratory support used

|                     | Mean $\pm$ SD or Median (IQR) according to highest respiratory support modality used |                    |                                  |                     |                     | P        |
|---------------------|--------------------------------------------------------------------------------------|--------------------|----------------------------------|---------------------|---------------------|----------|
|                     | 0L<br>(n = 14)                                                                       | 1–10L<br>(n = 69)  | 11–16L or<br>Venturi<br>(n = 20) | HFNC<br>(n = 14)    | MV<br>(n = 14)      |          |
| LUS score           | 10 (3–21)                                                                            | 24 (19–26)         | 32 (27–35)                       | 35 (32–38)          | 36 (31–38)          | <0.0001  |
| Age (years)         | 61.3 $\pm$ 16.0                                                                      | 63.8 $\pm$ 11.8    | 64.6 $\pm$ 10.4                  | 64.6 $\pm$ 9.2      | 72.2 $\pm$ 8.7      | 0.115    |
| Infiltration        |                                                                                      |                    |                                  |                     |                     |          |
| Upper region (0–18) | 1.5<br>(0.0–3.0)                                                                     | 5.0<br>(4.0–7.0)   | 8.0<br>(6.0–10.0)                | 9.5<br>(8.0–11.0)   | 8.5<br>(6.0–9.0)    | <0.0001* |
| Middle region (0–6) | 3.0<br>(0.0–7.0)                                                                     | 7.0<br>(5.0–9.0)   | 10.0<br>(9.5–10.5)               | 11.0<br>(10.0–12.0) | 11.5<br>(11.0–12.0) | <0.0001† |
| Basal region (0–18) | 4.5<br>(3.0–11.0)                                                                    | 11.0<br>(8.0–12.0) | 13.0<br>(11.5–16.0)              | 14.5<br>(13.0–17.0) | 15.5<br>(12.0–17.0) | <0.0001* |

\* Pairwise comparison of subgroups detected significant differences in: 0L vs. 1–10L, 0L vs. 10–16L, 0L vs. HFNC, 0L vs. MV, 1 – 10L vs. 10 – 16L, 1 – 10L vs. HFNC, and 1 – 10L vs. MV.

† Pairwise comparison of subgroups detected significant differences in : 0L vs. 1–10L, 0L vs. 10–16L, 0L vs. HFNC, 0L vs. MV, 1 – 10L vs. 10 – 16L, 1 – 10L vs. HFNC, 1 – 10L vs. MV and 11 – 16L vs. MV. Acronyms: HFNC – high flow nasal cannula; IQR – interquartile range; LUS score– lung ultrasound score; MV – mechanical ventilation.
