# Supplementary material for: Role of Lung Ultrasound in Predicting Clinical Severity and Fatality in COVID-19 Pneumonia
Source: J Pers Med. 2021 Jul 30;11(8):757. doi: 10.3390/jpm11080757 (PMC8399683; doi:10.3390/jpm11080757)
Supplement: Supplementary file 1 [file jpm-11-00757-s001.zip › Supplementary file 3 - Logistic regression according to highest respiratory support (mechanical ventilation) (1).pdf]

Table S1 – Univariate logistic regression according to highest respiratory support (0 – 16L vs. HFNC)

|                                     | $\beta$ | Wald  | P            | OR    | 95% CI       |
|-------------------------------------|---------|-------|--------------|-------|--------------|
| Age                                 | 0.007   | 0.09  | 0.77         | 1.01  | 0.96 – 1.06  |
| LUS score                           | 0.35    | 17.9  | <0.001       | 1.42  | 1.21 – 1.68  |
| Day of the illness                  | 0.02    | 1.99  | 0.16         | 1.02  | 0.99 – 1.05  |
| CRP (mg/L)                          | 0.003   | 1.07  | 0.30         | 1.003 | 0.99 – 1.008 |
| Leukocyte count ( $\times 10^9/L$ ) | 0.08    | 1.68  | 0.20         | 1.09  | 0.96 – 1.23  |
| Neutrophils (%)                     | 0.06    | 2.5   | 0.11         | 1.06  | 0.98 – 1.15  |
| Lymphocytes (%)                     | -0.06   | 1.88  | 0.17         | 0.94  | 0.86 – 1.03  |
| D-dimer ( $\mu g/L$ )               | 0.004   | 0.002 | 0.96         | 1.004 | 0.85 – 1.19  |
| LDH (U/L)                           | 0.002   | 1.32  | 0.25         | 1.002 | 0.99 – 1.01  |
| spO <sub>2</sub> (%)                | -0.03   | 1.29  | 0.26         | 0.97  | 0.93 – 1.02  |
| pO <sub>2</sub> (kPa)               | -0.41   | 2.38  | 0.12         | 0.66  | 0.39 – 1.12  |
| Comorbidity                         |         |       |              |       |              |
| Arterial hypertension               | 0.64    | 0.86  | 0.35         | 1.89  | 0.49 – 7.21  |
| Diabetes                            | 0.17    | 0.07  | 0.79         | 1.18  | 0.34 – 4.10  |
| Cardiovascular                      | 0.51    | 0.62  | 0.43         | 1.66  | 0.47 – 5.84  |
| Malignancy                          | 0.83    | 1.29  | 0.26         | 2.28  | 0.55 – 9.45  |
| Infiltration                        |         |       |              |       |              |
| Upper region (0 – 12)               | 0.42    | 6.63  | <b>0.01</b>  | 1.53  | 1.11 – 2.10  |
| Middle region (0 – 12)              | 0.61    | 4.93  | <b>0.03</b>  | 1.84  | 1.07 – 3.15  |
| Basal region (0 – 18)               | 0.19    | 2.42  | 0.12         | 1.21  | 0.95 – 1.56  |
| Anterior (0 – 12)                   | 0.31    | 4.57  | 0.03         | 1.36  | 1.03 – 1.79  |
| Lateral (0 – 12)                    | 0.56    | 6.20  | <b>0.01</b>  | 1.75  | 1.13 – 2.72  |
| Posterior (0 – 18)                  | 0.32    | 5.80  | <b>0.02</b>  | 1.38  | 1.06 – 1.78  |
| Left (0 – 21)                       | 0.26    | 3.92  | 0.05         | 1.30  | 1.003 – 1.69 |
| Right (0 – 21)                      | 0.44    | 9.55  | <b>0.002</b> | 1.56  | 1.18 – 2.06  |

Acronyms: CI – confidence interval, HFNC high flow nasal cannula, LUS score – lung ultrasound score, OR – odds ratio.

Table S2 – Multivariate regression analysis according to highest respiratory support (0 – 16L vs. HFNC)

|           | $\beta$ | Wald   | P      | OR   | 95% CI      |
|-----------|---------|--------|--------|------|-------------|
| LUS score | 0.353   | 17.918 | <0.001 | 1.42 | 1.21 – 1.68 |
| Constant  | -12.414 | 20.964 | <0.001 |      |             |

Two independent predictors (Stepwise method) gave a unique statistically significant contribution to the model and these are LUS and age (Hosmer - Lemeshow test,  $P = 0.868$ ). The model as a whole is statistically significant ( $\chi^2 = 336.81$ ,  $P < 0.001$ ), and explains between 27.0% (according to Cox & Snell) and 52.0% (according to Nagelkerke) the variance of the negative outcome (necessity of NFHC oxygen administration), and accurately classifies 90.6% of cases.

Table S3 – Univariate logistic regression according to highest respiratory support (mechanical ventilation)

|                                     | $\beta$ | Wald   | P                 | OR   | 95% CI      |
|-------------------------------------|---------|--------|-------------------|------|-------------|
| Age                                 | 0.076   | 6.309  | <b>0.012</b>      | 1.08 | 1.02 - 1.15 |
| LUS score                           | 0.220   | 14.348 | <b>&lt; 0.001</b> | 1.25 | 1.11 - 1.40 |
| Day of the illness                  | -0.133  | 3.869  | <b>0.049</b>      | 0.88 | 0.77 - 1.00 |
| CRP (mg/L)                          | 0.001   | 0.031  | 0.861             | 1.00 | 0.99 - 1.01 |
| Leukocyte count ( $\times 10^9/L$ ) | -0.031  | 0.161  | 0.688             | 0.97 | 0.83 - 1.13 |
| Neutrophils (%)                     | -0.001  | 0.001  | 0.978             | 1.00 | 0.94 - 1.06 |
| Lymphocytes (%)                     | 0.003   | 0.005  | 0.943             | 1.00 | 0.93 - 1.08 |
| D-dimer ( $\mu g/L$ )               | 0.025   | 0.096  | 0.756             | 1.03 | 0.88 - 1.20 |
| LDH (U/L)                           | 0.002   | 2.058  | 0.152             | 1.00 | 1.00 - 1.01 |
| Troponin (ng/L)                     | 0.005   | 0.081  | 0.776             | 1.00 | 0.97 - 1.04 |
| spO <sub>2</sub> (%)                | -0.026  | 0.626  | 0.429             | 0.97 | 0.91 - 1.04 |
| pO <sub>2</sub> (kPa)               | -0.317  | 1.135  | 0.287             | 0.73 | 0.41 - 1.31 |
| Comorbidity                         |         |        |                   |      |             |
| Arterial hypertension               | -0.262  | 0.188  | 0.664             | 0.77 | 0.24 - 2.51 |
| Diabetes                            | -0.139  | 0.041  | 0.840             | 0.87 | 0.22 - 3.37 |
| Cardiovascular                      | 0.885   | 2.073  | 0.150             | 2.42 | 0.73 - 8.07 |
| Malignancy                          | -0.489  | 0.206  | 0.650             | 0.61 | 0.07 - 5.08 |
| Infiltration                        |         |        |                   |      |             |
| Upper region (0 – 12)               | 0.275   | 6.799  | <b>0.009</b>      | 1.32 | 1.07 - 1.62 |
| Middle region (0 – 12)              | 1.059   | 12.554 | <b>&lt; 0.001</b> | 2.88 | 1.61 - 5.18 |
| Basal region (0 – 18)               | 0.354   | 10.550 | <b>0.001</b>      | 1.42 | 1.15 - 1.76 |
| Anterior (0 – 12)                   | 0.244   | 6.438  | <b>0.011</b>      | 1.28 | 1.06 - 1.54 |
| Lateral (0 – 12)                    | 0.575   | 10.203 | <b>0.001</b>      | 1.78 | 1.25 - 2.53 |
| Posterior (0 – 18)                  | 0.429   | 11.840 | <b>0.001</b>      | 1.54 | 1.20 - 1.96 |
| Left (0 – 21)                       | 0.321   | 12.081 | <b>0.001</b>      | 1.38 | 1.15 - 1.65 |
| Right (0 – 21)                      | 0.378   | 12.227 | <b>0.001</b>      | 1.46 | 1.18 - 1.80 |

Acronyms: LUS – lung ultrasound score; OR – odds ratio;

Table S4 – Multivariate regression analysis according to highest respiratory support (mechanical ventilation)

|           | $\beta$ | Wald   | P      | OR   | 95% CI      |
|-----------|---------|--------|--------|------|-------------|
| Age       | 0.081   | 5.051  | 0.025  | 1.08 | 1.01 – 1.16 |
| LUS score | 0.215   | 12.617 | <0.001 | 1.24 | 1.10 – 1.40 |
| Constant  | -14.044 | 17.192 | <0.001 |      |             |

Two independent predictors (Stepwise method) gave a unique statistically significant contribution to the model and these are LUS and age (Hosmer - Lemeshow test,  $P = 0.89$ ). The model as a whole is statistically significant ( $\chi^2 = 28.20$ ,  $P < 0.001$ ), and explains between 19.4% (according to Cox & Snell) and 39.3% (according to Nagelkerke) the variance of the negative outcome, and accurately classifies 91.6% of cases.
