# Supplementary material for: Role of Lung Ultrasound in Predicting Clinical Severity and Fatality in COVID-19 Pneumonia
Source: J Pers Med. 2021 Jul 30;11(8):757. doi: 10.3390/jpm11080757 (PMC8399683; doi:10.3390/jpm11080757)
Supplement: Supplementary file 1 [file jpm-11-00757-s001.zip › Supplementary file 5 - Logistic regression according to mortality (1).pdf]

Table S1 – Univariate logistic regression according to mortality

|                                        | $\beta$ | Wald   | P                | OR          | 95% CI      |
|----------------------------------------|---------|--------|------------------|-------------|-------------|
| Age                                    | 0.151   | 15.658 | <b>&lt;0.001</b> | <b>1.16</b> | 1.08 – 1.25 |
| LUS score                              | 0.260   | 17.792 | <b>&lt;0.001</b> | <b>1.30</b> | 1.15 – 1.46 |
| Day of the illness                     | 0.021   | 1.921  | 0.166            | 1.02        | 0.99 – 1.05 |
| CRP (mg/L)                             | 0.000   | 0.007  | 0.935            | 1.00        | 0.99 – 1.01 |
| Leukocyte count (x 10 <sup>9</sup> /L) | 0.019   | 0.079  | 0.778            | 1.02        | 0.89 – 1.16 |
| Neutrophils (%)                        | 0.037   | 1.116  | 0.291            | 1.04        | 0.97 – 1.11 |
| Lymphocytes (%)                        | -0.059  | 1.719  | 0.190            | 0.94        | 0.86 – 1.03 |
| D-dimer (µg/L)                         | 0.059   | 0.908  | 0.341            | 1.06        | 0.94 – 1.20 |
| LDH (U/L)                              | 0.003   | 3.681  | 0.055            | 1.00        | 1.00 – 1.01 |
| Troponin (ng/L)                        | 0.024   | 2.869  | 0.090            | 1.02        | 1.00 – 1.05 |
| spO2 (%)                               | -0.035  | 1.366  | 0.243            | 0.97        | 0.91 – 1.02 |
| pO2 (kPa)                              | -0.216  | 0.637  | 0.425            | 0.81        | 0.47 – 1.37 |
| Comorbidity                            |         |        |                  |             |             |
| Arterial hypertension                  | 0.758   | 1.262  | 0.261            | 2.13        | 0.57 – 8.00 |
| Diabetes                               | 0.075   | 0.015  | 0.904            | 1.08        | 0.32 – 3.65 |
| Cardiovascular                         | 1.632   | 8.170  | <b>0.004</b>     | <b>5.12</b> | 1.67 – 5.67 |
| Malignancy                             | 1.235   | 3.455  | <b>0.063</b>     | <b>3.44</b> | 0.93 – 2.64 |
| Infiltration                           |         |        |                  |             |             |
| Upper region (0 – 12)                  | 0.448   | 13.355 | <b>&lt;0.001</b> | <b>1.56</b> | 1.23 – 1.99 |
| Middle region (0 – 12)                 | 0.821   | 12.957 | <b>&lt;0.001</b> | <b>2.27</b> | 1.45 – 3.56 |
| Basal region (0 – 18)                  | 0.358   | 11.933 | <b>0.001</b>     | <b>1.43</b> | 1.17 – 1.75 |
| Anterior (0 – 12)                      | 0.330   | 10.682 | <b>0.001</b>     | <b>1.39</b> | 1.14 – 1.69 |
| Lateral (0 – 12)                       | 0.538   | 10.879 | <b>0.001</b>     | <b>1.71</b> | 1.24 – 2.36 |
| Posterior (0 – 18)                     | 0.474   | 14.201 | <b>&lt;0.001</b> | <b>1.61</b> | 1.26 – 2.06 |
| Left (0 – 21)                          | 0.406   | 16.437 | <b>&lt;0.001</b> | <b>1.50</b> | 1.23 – 1.83 |
| Right (0 – 21)                         | 0.396   | 14.208 | <b>&lt;0.001</b> | <b>1.49</b> | 1.21 – 1.83 |

Acronyms: LUS score – lung ultrasound score; OR – odds ratio;

Table S2 – Multivariate regression analysis according to mortality

|           | $\beta$ | Wald   | P                | OR          | 95% CI      |
|-----------|---------|--------|------------------|-------------|-------------|
| Age       | 0.232   | 13.510 | <b>&lt;0.001</b> | <b>1.26</b> | 1.14 – 1.43 |
| LUS score | 0.344   | 14.589 | <b>&lt;0.001</b> | <b>1.41</b> | 1.18 – 1.68 |
| Constant  | -28.864 | 18.882 | <b>&lt;0.001</b> |             |             |

Two independent predictors (Stepwise method) gave a unique statistically significant contribution to the model and these are LUS and age (Hosmer - Lemeshow test,  $P = 0.41$ ). The model as a whole is statistically significant ( $\chi^2 = 57.49$ ,  $P < 0.001$ ), and explains between 35.5% (according to Cox & Snell) and 67.8% (according to Nagelkerke) the variance of the negative outcome, and accurately classifies 95.4% of cases.
