# Supplementary material for: Role of Lung Ultrasound in Predicting Clinical Severity and Fatality in COVID-19 Pneumonia
Source: J Pers Med. 2021 Jul 30;11(8):757. doi: 10.3390/jpm11080757 (PMC8399683; doi:10.3390/jpm11080757)

Table S1 – Multivariate regression analysis according to highest respiratory support (mechanical ventilation) with all ultrasonic parameters included

|                               | $\beta$ | Wald   | P      | OR   | 95% CI      |
|-------------------------------|---------|--------|--------|------|-------------|
| Age                           | 0.078   | 4.314  | 0.038  | 1.08 | 1.00 – 1.16 |
| Infiltration in middle region | 1.049   | 10.871 | 0.001  | 2.86 | 1.53 – 5.33 |
| Constant                      | -17.892 | 15.299 | <0.001 |      |             |

Two independent predictors (Stepwise method) gave a unique statistically significant contribution to the model and these are age and infiltration in middle regions (Hosmer - Lemeshow test,  $P = 0.94$ ). The model as a whole is statistically significant ( $\chi^2 = 34.72$ ,  $P < 0.001$ ), and explains between 23.3% (according to Cox & Snell) and 47.2% (according to Nagelkerke) the variance of the negative outcome, and accurately classifies 93.9% of cases.

Table S2 – Receiver operating characteristic curve parameters according to highest respiratory support (mechanical ventilation) with all ultrasonic parameters included

| Parameters                    | AUC   | 95% CI        | Sensitivity | Specificity | Cutoff | Youden index | $P$    | $P$ Age vs. Infiltration in middle region |
|-------------------------------|-------|---------------|-------------|-------------|--------|--------------|--------|-------------------------------------------|
| Age                           | 0.714 | 0.629 – 0.790 | 71.4        | 65.8        | >68    | 0.38         | 0.001  | 0.013                                     |
| Infiltration in middle region | 0.891 | 0.824 – 0.938 | 78.6        | 85.5        | >10    | 0.64         | <0.001 |                                           |

AUC = area under curve

Figure S1 – Receiver operating curve analysis for age and infiltration of the middle region according to highest respiratory modality (mechanical ventilation) with all ultrasonic parameters included

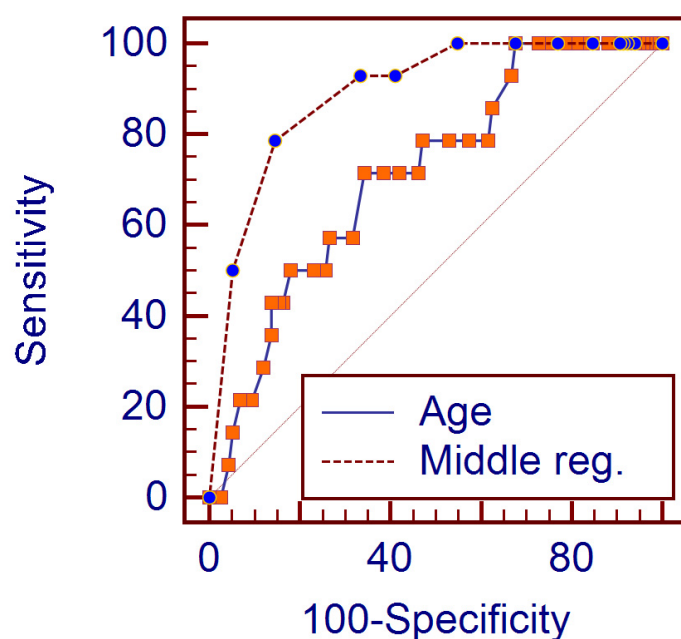

Supplement: Supplementary file 1 [file jpm-11-00757-s001.zip › Supplementary file 6 - Multivariate and ROC analysis when all ultrasonic parameters included.pdf]
